# Supplementary material
Source: HighWire-hosted journal article supplement (https://erj.ersjournals.com/content/56/1/2000011)
Supplement: inline-supplementary-material-2 [file inline-supplementary-material-2.pdf]

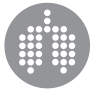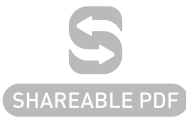

# Patterns and determinants of exhaled nitric oxide trajectories in schoolchildren over a 7-year period

Erika Garcia <sup>1</sup>, Yue Zhang<sup>2</sup>, Edward B. Rappaport<sup>1</sup>, Kiros Berhane<sup>1</sup>, Patrick Muchmore<sup>1</sup>, Philip E. Silkoff<sup>3</sup>, Noa Molshatzki<sup>1</sup>, Frank D. Gilliland<sup>1</sup> and Sandrah P. Eckel<sup>1</sup>

**Affiliations:** <sup>1</sup>Dept of Preventive Medicine, Keck School of Medicine, University of Southern California, Los Angeles, CA, USA. <sup>2</sup>Dept of Internal Medicine, University of Utah, Salt Lake City, UT, USA. <sup>3</sup>Philadelphia, PA, USA.

**Correspondence:** Sandrah P. Eckel, USC Dept of Preventive Medicine, 2001 N. Soto Street, SSB 202B, MC-9234, Los Angeles, CA 90089, USA. E-mail: eckel@usc.edu

 @ERSpublications

**Longitudinal  $F_{\text{ENO}_{50}}$  trajectories in healthy children aged 8–16 years displayed a similar upward trend in males and females until age 11.5, after which males had higher  $F_{\text{ENO}_{50}}$ . Males with higher starting BMI percentile had attenuated  $F_{\text{ENO}_{50}}$  slopes with age.** <https://bit.ly/2UMb8mI>

**Cite this article as:** Garcia E, Zhang Y, Rappaport EB, *et al.* Patterns and determinants of exhaled nitric oxide trajectories in schoolchildren over a 7-year period. *Eur Respir J* 2020; 56: 2000011 [<https://doi.org/10.1183/13993003.00011-2020>].

This single-page version can be shared freely online.

**ABSTRACT** Fractional exhaled nitric oxide ( $F_{\text{ENO}_{50}}$ ), a marker of allergic airway inflammation, is used in respiratory research and asthma clinical care; however, its trajectory with increasing age during childhood has not been well characterised. We examined  $F_{\text{ENO}_{50}}$  longitudinally during a period of important somatic growth to describe trajectories across childhood and adolescence in healthy participants and evaluate clinical factors as potential determinants of trajectories.

$F_{\text{ENO}_{50}}$  was collected at six visits over 8 years in a population-based cohort of 1791 schoolchildren without asthma (median age at entry 8.4 years). Smooth sex-specific  $F_{\text{ENO}_{50}}$  trajectories were estimated using generalised additive mixed models, with participant-level random effects. We evaluated whether sex-specific trajectories were influenced by race/ethnicity, body mass index (BMI) percentile, allergic rhinitis or puberty.

Different  $F_{\text{ENO}_{50}}$  patterns were observed by sex in later childhood and several factors were associated with either  $F_{\text{ENO}_{50}}$  level or change in  $F_{\text{ENO}_{50}}$  as participants aged.  $F_{\text{ENO}_{50}}$ -age trajectories were similar by sex until age ~11.5 years, after which males had greater  $F_{\text{ENO}_{50}}$  change than females. This divergence in  $F_{\text{ENO}_{50}}$ -age trajectories coincides with puberty. Males with higher starting BMI percentile had attenuated  $F_{\text{ENO}_{50}}$ -age slopes. Among males,  $F_{\text{ENO}_{50}}$  levels were lower in non-Hispanic white subjects. Among both sexes, participants with rhinitis had higher  $F_{\text{ENO}_{50}}$ .  $F_{\text{ENO}_{50}}$  levels within individuals tracked over time; however, there was considerable variation in  $F_{\text{ENO}_{50}}$  patterns across participants.

$F_{\text{ENO}_{50}}$  trajectories from longitudinal data provide evidence of sex differences coinciding with puberty, suggesting potential hormone link. Improved understanding of determinants of  $F_{\text{ENO}_{50}}$  trajectories is needed to realise the potential for using individualised predicted  $F_{\text{ENO}_{50}}$  trajectories.
